# Supplementary material for: Ultrasmall SnO2 nanocrystals sandwiched into polypyrrole and Ti3C2Tx MXene for highly effective sodium storage
Source: Royal Society of Chemistry journal article supplement (doi:10.1039/d0qm00598c), 2020-10-30
Supplement: d0qm00598c1.pdf [file d0qm00598c1.pdf]

## Supporting Information

### Ultrasmall SnO<sub>2</sub> nanocrystals sandwiched into polypyrrole and Ti<sub>3</sub>C<sub>2</sub>T<sub>x</sub> MXene for high-effective sodium storage

Jianfeng Ding,<sup>a#</sup> Cheng Tang,<sup>c#</sup> Guanjia Zhu,<sup>a</sup> Fengyi He,<sup>a</sup> Aijun Du,<sup>c\*</sup> Minghong  
Wu,<sup>b</sup> and Haijiao Zhang<sup>a\*</sup>

*<sup>a</sup>Institute of Nanochemistry and Nanobiology, Shanghai University, Shanghai 200444,  
P. R. China*

*<sup>b</sup>School of Environmental and Chemical Engineering, Shanghai University, Shanghai  
200444, P. R. China*

*<sup>c</sup>School of Chemistry, Physics and Mechanical Engineering, Science and Engineering  
Faculty, Queensland University of Technology, Brisbane, QLD 4001, Australia*

#J. F. Ding and C. Tang contributed equally to this work.

\*Corresponding author

E-mail: [hjzhang128@shu.edu.cn](mailto:hjzhang128@shu.edu.cn), [aijun.du@qut.edu.au](mailto:aijun.du@qut.edu.au)

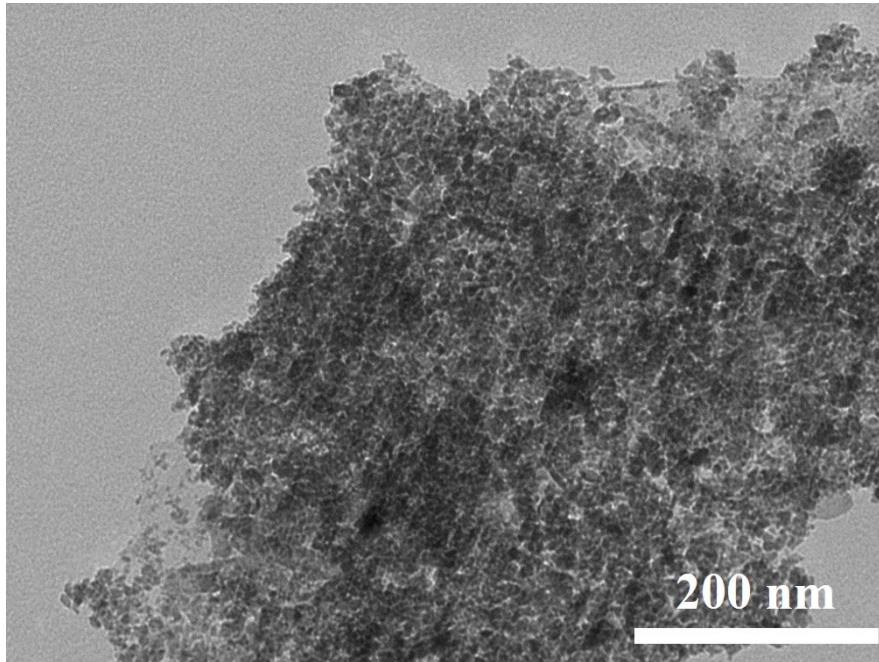

**Figure S1.** TEM image of SnO<sub>2</sub>/Ti<sub>3</sub>C<sub>2</sub>.

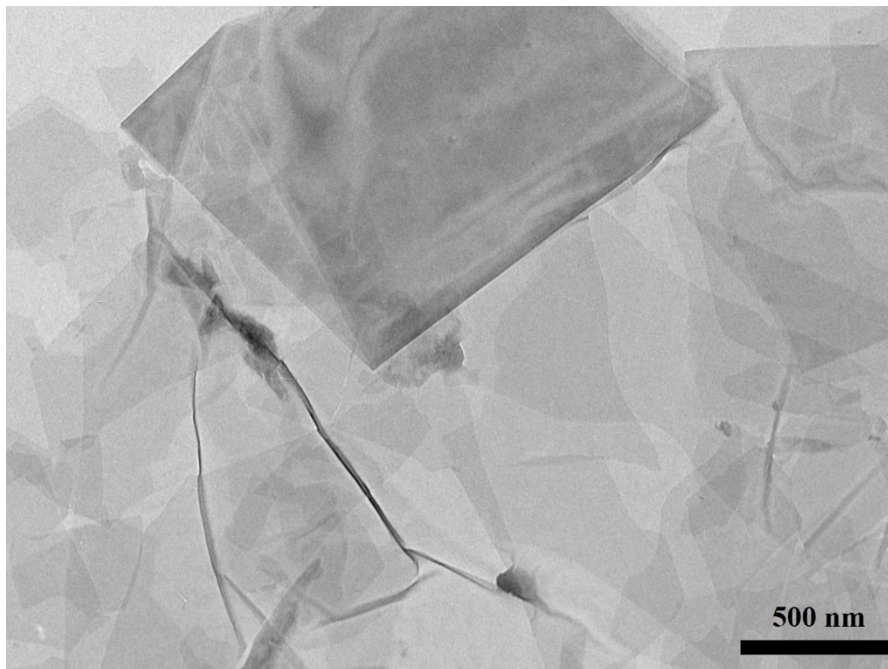

**Figure S2.** TEM image of Ti<sub>3</sub>C<sub>2</sub>T<sub>x</sub> MXene.

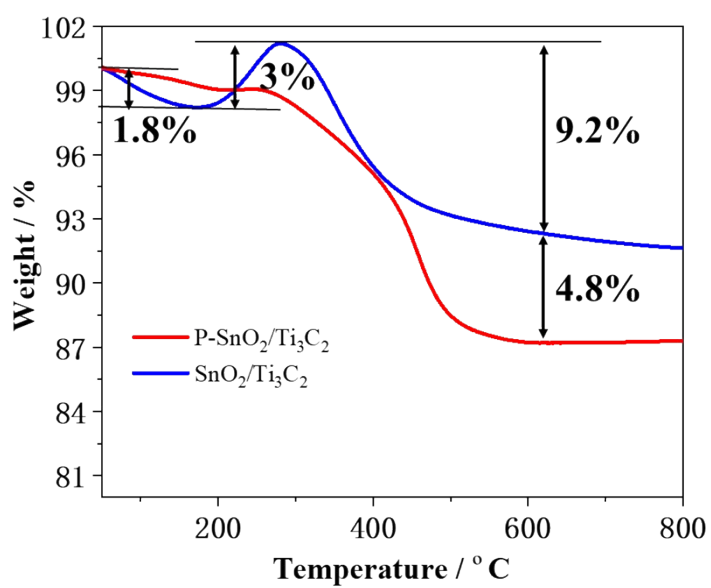

**Figure S3.** TGA curves of P-SnO<sub>2</sub>/Ti<sub>3</sub>C<sub>2</sub> and SnO<sub>2</sub>/Ti<sub>3</sub>C<sub>2</sub> composites.

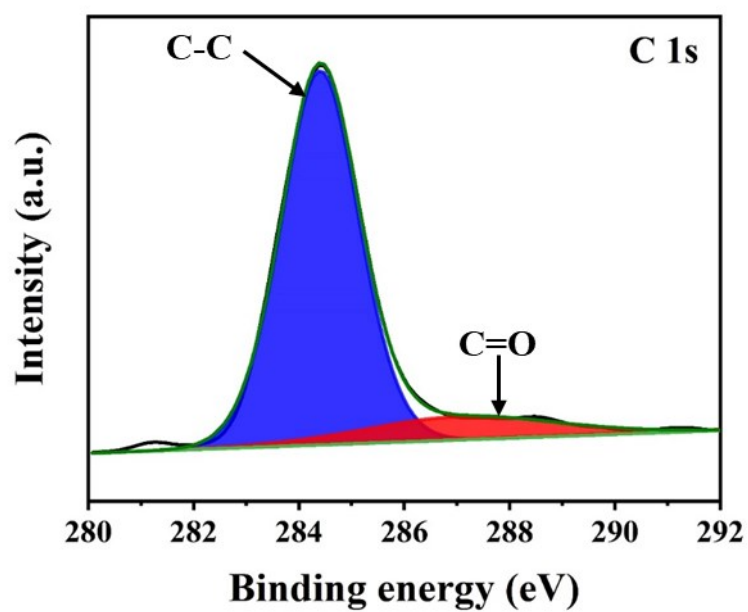

**Figure S4.** High-resolution XPS spectra of C 1s for P-SnO<sub>2</sub>/Ti<sub>3</sub>C<sub>2</sub>.

**Table S1.** The electrochemical performance comparison of MXene-based materials.

| <b>Electrode materials</b>                                                       | <b>Current density (mA g<sup>-1</sup>)</b> | <b>Gravimetric capacity (mAh g<sup>-1</sup>)</b> | <b>Battery</b> | <b>Cycle number</b> | <b>Ref.</b> |
|----------------------------------------------------------------------------------|--------------------------------------------|--------------------------------------------------|----------------|---------------------|-------------|
| P-SnO <sub>2</sub> /Ti <sub>3</sub> C <sub>2</sub>                               | 100                                        | 345.3                                            | SIBs           | 200                 | This work   |
| MX/SnS <sub>2</sub> _1:5                                                         | 100                                        | 322                                              | SIBs           | 200                 | [1]         |
| SnS/Ti <sub>3</sub> C <sub>2</sub> T <sub>x</sub>                                | 500                                        | 310                                              | SIBs           | 50                  | [2]         |
| SnS/PDDA-Ti <sub>3</sub> C <sub>2</sub>                                          | 100                                        | 640                                              | LIBs           | 100                 | [3]         |
| SnO <sub>2</sub> -Ti <sub>3</sub> C <sub>2</sub>                                 | 100                                        | 360                                              | LIBs           | 200                 | [4]         |
| SnO <sub>2</sub> /Ti <sub>3</sub> C <sub>2</sub> T <sub>x</sub>                  | 200                                        | 697                                              | LIBs           | 520                 | [5]         |
| MoS <sub>2</sub> /Ti <sub>3</sub> C <sub>2</sub> T <sub>x</sub>                  | 100                                        | 251                                              | SIBs           | 100                 | [6]         |
| MoS <sub>2</sub> /Mo <sub>2</sub> TiC <sub>2</sub> T <sub>x</sub> -500           | 100                                        | 509                                              | LIBs           | 100                 | [7]         |
| MoSe <sub>2</sub> /MXene                                                         | 200                                        | 355                                              | KIBs           | 100                 | [8]         |
| MoS <sub>2</sub> /Ti <sub>3</sub> C <sub>2</sub> T <sub>x</sub>                  | 100                                        | 330                                              | SIBs           | 70                  | [9]         |
| Ti <sub>2</sub> C/TiO <sub>2</sub>                                               | 100                                        | 389                                              | LIBs           | 50                  | [10]        |
| SnO <sub>2</sub> @C/d-Ti <sub>3</sub> C <sub>2</sub>                             | 500                                        | 470                                              | LIBs           | 100                 | [11]        |
| SnO <sub>2</sub> /MXene                                                          | 100                                        | 663                                              | LIBs           | 100                 | [12]        |
| SnS <sub>2</sub> /Sn <sub>3</sub> S <sub>4</sub> -Ti <sub>3</sub> C <sub>2</sub> | 100                                        | 462.3                                            | LIBs           | 100                 | [13]        |

## References

- [1] Y. Wu, P. Nie, L. Wu, H. Dou, and X. Zhang, 2D MXene/SnS<sub>2</sub> composites as high-performance anodes for sodium ion batteries, *Chem. Eng. J.*, 2018, 334, 932–938.

- [2] Y. Zhang, B. Guo, L. Hu, Q. Xu, Y. Li, D. Liu and M. Xu, Synthesis of SnS nanoparticle-modified MXene ( $Ti_3C_2T_x$ ) composites for enhanced sodium storage, *J. Alloys Compd.*, 2018, 732, 448-453.
- [3] J. Ai, Y. Lei, S. Yang, C. Lai, and Q. Xu, SnS nanoparticles anchored on  $Ti_3C_2$  nanosheets matrix via electrostatic attraction method as novel anode for lithium ion batteries, *Chem. Eng. J.*, 2019, 357, 150–158.
- [4] F. Wang, Z. Wang, J. Zhu, H. Yang, X. Chen, L. Wang and C. Yang, Facile synthesis SnO<sub>2</sub> nanoparticle-modified  $Ti_3C_2$  MXene nanocomposites for enhanced lithium storage application, *J. Mater. Sci.*, 2017, 52, 3556-3565.
- [5] J. Xiong, L. Pan, H. Wang, F. Du, Y. Chen, J. Yang and C. J. Zhang, Synergistically enhanced lithium storage performance based on titanium carbide nanosheets (MXene) backbone and SnO<sub>2</sub> quantum dots, *Electrochim. Acta*, 2018, 268, 503-511.
- [6] Y. Wu, P. Nie, J. Jiang, B. Ding, H. Dou, and X. Zhang, MoS<sub>2</sub>-nanosheet-decorated 2D titanium carbide (MXene) as high-performance anodes for Sodium-ion batteries, *ChemElectroChem*, 2017, 4, 15601565.
- [7] C. Chen, X. Xie, B. Anasori, A. Sarycheva, T. Makaryan, M. Zhao, P. Urbankowski, L. Miao, J. Jiang and Y. Gogotsi, MoS<sub>2</sub>-on-MXene heterostructures as highly reversible anode materials for lithium-ion batteries, *Angew. Chem. Int. Ed. Eng.*, 2018, 57, 1846-1850.
- [8] H. Huang, J. Cui, G. Liu, R. Bi, and L. Zhang, Carbon-coated MoSe<sub>2</sub>/MXene hybrid nanosheets for superior potassium storage, *ACS Nano*, 2019, 13, 3448-3456.
- [9] G. Du, M. Tao, W. Gao, Y. Zhang, R. Zhan, S. Bao and M. Xu, Preparation of MoS<sub>2</sub>/ $Ti_3C_2T_x$  composite as anode material with enhanced sodium/lithium storage performance, *Inorg. Chem.*

*Front.*, 2019, 6, 117-125.

[10] B. Ahmed, D. H. Anjum, M. N. Hedhili, Y. Gogotsi, and H. N. Alshareef, H<sub>2</sub>O<sub>2</sub> assisted room temperature oxidation of Ti<sub>2</sub>C MXene for Li-ion battery anodes, *Nanoscale*, 2016, 8, 7580-7587.

[11] H. Zhang, P. Zhang, W. Zheng, W. Tian, J. Chen, Y. Zhang and Z. Sun, 3D d-Ti<sub>3</sub>C<sub>2</sub> xerogel framework decorated with core-shell SnO<sub>2</sub>@C for high-performance lithium-ion batteries, *Electrochim. Acta*, 2018, 285, 94-102.

[12] K. Wang, X. Zhu, C. Wang, Y. Hu, L. Gu, S. Qiu, X. Gao and Y. Mao, Self-standing hybrid film of SnO<sub>2</sub> nanotubes and MXene as a high-performance anode material for thin film lithium-ion batteries, *ChemistrySelect*, 2019, 4, 12099-12103.

[13] J. Li, L. Han, Y. Li, J. Li, G. Zhu, X. Zhang, T. Lu and L. Pan, MXene-decorated SnS<sub>2</sub>/Sn<sub>3</sub>S<sub>4</sub> hybrid as anode material for high-rate lithium-ion batteries, *Chem. Eng. J.*, 2020, 380, 122590.
